# Supplementary material for: Effects of different head groups and functionalised side chains on the cytotoxicity of ionic liquids
Source: Royal Society of Chemistry journal article supplement (doi:10.1039/b615326g), 2007-01-01
Supplement: b615326g.pdf [file b615326g.pdf]

**Electronic Supplementary Information to  
"Effects of different head groups and functionalised  
side chains on the cytotoxicity of ionic liquids"**

Stefan Stolte and Johannes Ranke

February 23, 2007

Table 1: All fitted  $EC_{50}$  values, their base 10 log and their confidence intervals.  
The definitions of mtype, a, b, and c are given in the documentation of the R package drfit:  
<http://cran.r-project.org/src/contrib/Descriptions/drfit.html>

| Acronym            | mtype      | $EC_{50}$<br>[ $\mu$ M] | $\log_{10} EC_{50}$ | b     | c           |
|--------------------|------------|-------------------------|---------------------|-------|-------------|
| IM1-14 Cl          | linlogit   | 0.379                   | $-0.421 \pm 0.049$  | 2.11  | 2.21        |
| IM11CN (CF3SO2)2N  | linlogit   | 7950                    | $3.9 \pm 0.032$     | 3.51  | 0.000194    |
| IM11CN Cl          | inactive   | > 20000                 | > 4.3               |       |             |
| IM11O2 (CF3SO2)2N  | linlogit   | 1590                    | $3.2 \pm 0.04$      | 3.85  | 0.000542    |
| IM11O2 Cl          | linlogit   | 4010                    | $3.6 \pm NA$        | 6.67  | $-5.72e-05$ |
| IM12O1 (CF3SO2)2N  | linlogit   | 1780                    | $3.25 \pm 0.078$    | 5.88  | 0.000424    |
| IM12O1 Cl          | inactive   | > 20000                 | > 4.3               |       |             |
| IM12O2 (CF3SO2)2N  | linlogit   | 1520                    | $3.18 \pm 0.056$    | 2.9   | 0.000925    |
| IM12O2 Br          | linlogit   | 13800                   | $4.14 \pm 0.045$    | 2.37  | $5.77e-05$  |
| IM12OH (CF3SO2)2N  | linlogit   | 5800                    | $3.76 \pm 0.024$    | 3.52  | 0.000158    |
| IM12OH I           | inactive   | > 20000                 | > 4.3               |       |             |
| IM13O1 (CF3SO2)2N  | linlogit   | 2200                    | $3.34 \pm 0.025$    | 3.5   | 0.000563    |
| IM13O1 Cl          | linlogit   | 31000                   | $4.49 \pm 0.049$    | 2.56  | $6.55e-05$  |
| IM13OH (CF3SO2)2N  | linlogit   | 4570                    | $3.66 \pm 0.038$    | 2.97  | 0.000251    |
| IM13OH Cl          | inactive   | > 20000                 | > 4.3               |       |             |
| IM14 (CF3SO2)2N    | linlogit   | 481                     | $2.68 \pm 0.041$    | 3.9   | 0.00188     |
| IM14 Cl            | linlogit   | 3580                    | $3.55 \pm 0.072$    | 1.92  | 0.000679    |
| Mor11CN (CF3SO2)2N | linlogit   | 3400                    | $3.53 \pm 0.074$    | 2.01  | 0.000363    |
| Mor11CN Cl         | inactive   | > 20000                 | > 4.3               |       |             |
| Mor11O2 (CF3SO2)2N | linlogit   | 2320                    | $3.37 \pm NA$       | 1.72  | $-8.16e-05$ |
| Mor11O2 Cl         | probit     | 3310                    | $3.52 \pm NA$       | 0.128 | 0           |
| Mor12O1 (CF3SO2)2N | linlogit   | 6470                    | $3.81 \pm NA$       | 4.8   | $6.1e-05$   |
| Mor12O1 Cl         | inactive   | > 20000                 | > 4.3               |       |             |
| Mor12O2 (CF3SO2)2N | linlogit   | 4910                    | $3.69 \pm 0.043$    | 5.12  | $-1.93e-05$ |
| Mor12O2 Br         | inactive   | > 20000                 | > 4.3               |       |             |
| Mor12OH (CF3SO2)2N | linlogit   | 1540                    | $3.19 \pm 0.11$     | 1.47  | 0.000497    |
| Mor12OH I          | inactive   | > 20000                 | > 4.3               |       |             |
| Mor13O1 (CF3SO2)2N | linlogit   | 5910                    | $3.77 \pm 0.053$    | 3.22  | $2.07e-05$  |
| Mor13O1 Cl         | inactive   | > 30000                 | > 4.48              |       |             |
| Mor13OH (CF3SO2)2N | probit     | 3360                    | $3.53 \pm 0.03$     | 0.191 | 0           |
| Mor13OH Cl         | inactive   | > 20000                 | > 4.3               |       |             |
| Mor14 (CF3SO2)2N   | linlogit   | 2690                    | $3.43 \pm 0.1$      | 1.12  | $-5.29e-05$ |
| Mor14 Br           | inactive   | > 20000                 | > 4.3               |       |             |
| N1121CN (CF3SO2)2N | probit     | 7340                    | $3.87 \pm 0.057$    | 0.21  | 0           |
| N1121CN Cl         | inactive   | > 20000                 | > 4.3               |       |             |
| N1121O2 (CF3SO2)2N | linlogit   | 6300                    | $3.8 \pm 0.033$     | 3.66  | 0.000247    |
| N1121O2 Cl         | linlogit   | 3900                    | $3.59 \pm NA$       | 9.62  | $2.59e-05$  |
| N1122O1 (CF3SO2)2N | linlogit   | 2040                    | $3.31 \pm 0.041$    | 3.01  | 0.000469    |
| N1122O1 Cl         | inactive   | > 20000                 | > 4.3               |       |             |
| N1122OH (CF3SO2)2N | manual fit | 6310                    | $3.8 \pm NA$        | 0     | 0           |
| N1122OH I          | inactive   | > 20000                 | > 4.3               |       |             |
| N1123O1 (CF3SO2)2N | linlogit   | 3430                    | $3.54 \pm 0.038$    | 6.14  | $-1.91e-05$ |
| N1123O1 Cl         | inactive   | > 40000                 | > 4.6               |       |             |
| N1123OH (CF3SO2)2N | linlogit   | 6730                    | $3.83 \pm 0.034$    | 3.82  | 0.000142    |
| N1124 (CF3SO2)2N   | probit     | 2680                    | $3.43 \pm 0.081$    | 0.163 | 0           |
| N1124 Cl           | inactive   | > 20000                 | > 4.3               |       |             |

Table 1: (continued)

| Acronym              | mtype    | EC <sub>50</sub> | log <sub>10</sub> EC <sub>50</sub> | b       | c         |
|----------------------|----------|------------------|------------------------------------|---------|-----------|
| Pip11CN (CF3SO2)2N   | linlogit | 10000            | 4 ± 0.11                           | 1.98    | 6.42e-05  |
| Pip11CN Cl           | linlogit | 38000            | 4.58 ± 0.064                       | -0.286  | -1.27e-05 |
| Pip11O2 (CF3SO2)2N   | linlogit | 2590             | 3.41 ± 0.054                       | 3.37    | 0.000303  |
| Pip11O2 Cl           | linlogit | 17200            | 4.24 ± 0.063                       | 0.397   | -3.81e-05 |
| Pip12O1 (CF3SO2)2N   | linlogit | 1890             | 3.28 ± NA                          | 2.44    | -1.15e-05 |
| Pip12O1 Br           | inactive | > 40000          | > 4.6                              |         |           |
| Pip12O2 (CF3SO2)2N   | probit   | 2210             | 3.35 ± NA                          | 0.105   | 0         |
| Pip12O2 Br           | linlogit | 20200            | 4.31 ± 0.07                        | 2.21    | 9.65e-05  |
| Pip12OH (CF3SO2)2N   | linlogit | 4500             | 3.65 ± 0.028                       | 3.96    | 0.000242  |
| Pip12OH I            | linlogit | 23400            | 4.37 ± 0.055                       | -0.0796 | -1.9e-05  |
| Pip13O1 (CF3SO2)2N   | linlogit | 1860             | 3.27 ± 0.035                       | 4.25    | 0.000385  |
| Pip13O1 Cl           | linlogit | 25200            | 4.4 ± 0.071                        | 2.04    | 6.52e-05  |
| Pip13OH (CF3SO2)2N   | linlogit | 4240             | 3.63 ± NA                          | 3.5     | -4.45e-06 |
| Pip13OH Cl           | inactive | > 40000          | > 4.6                              |         |           |
| Pip14 (CF3SO2)2N     | linlogit | 2570             | 3.41 ± 0.065                       | 2.68    | 0.000442  |
| Pip14 Br             | linlogit | 10800            | 4.03 ± 0.039                       | 2.22    | 0.000219  |
| Py1CN (CF3SO2)2N     | linlogit | 3150             | 3.5 ± 0.047                        | 2.59    | 0.000305  |
| Py1CN Cl             | linlogit | 6140             | 3.79 ± NA                          | 1.48    | 4.16e-05  |
| Py1O2 (CF3SO2)2N     | linlogit | 1330             | 3.12 ± 0.034                       | 3.67    | 0.000302  |
| Py1O2 Cl             | linlogit | 2100             | 3.32 ± NA                          | 5.53    | 0.000194  |
| Py2-4NMe2 (CF3SO2)2N | linlogit | 697              | 2.84 ± 0.11                        | 1.67    | 0.00604   |
| Py2-4NMe2 Br         | linlogit | 788              | 2.9 ± 0.068                        | 1.86    | 0.00798   |
| Py2O1 (CF3SO2)2N     | linlogit | 1540             | 3.19 ± 0.017                       | 4.92    | 5.5e-05   |
| Py2O1 Cl             | inactive | > 20000          | > 4.3                              |         |           |
| Py2O2 (CF3SO2)2N     | linlogit | 1840             | 3.26 ± 0.049                       | 4.09    | 0.000326  |
| Py2O2 Br             | linlogit | 17500            | 4.24 ± 0.067                       | 1.71    | 6.76e-05  |
| Py2OH (CF3SO2)2N     | linlogit | 6200             | 3.79 ± 0.045                       | 4.5     | 4.66e-05  |
| Py2OH I              | probit   | 14300            | 4.15 ± 0.12                        | 1.75    | 0         |
| Py3O1 (CF3SO2)2N     | linlogit | 2400             | 3.38 ± NA                          | 12      | 0.000191  |
| Py3O1 Cl             | inactive | > 40000          | > 4.6                              |         |           |
| Py3OH (CF3SO2)2N     | linlogit | 3530             | 3.55 ± 0.08                        | 2.8     | 0.000195  |
| Py3OH Cl             | inactive | > 20000          | > 4.3                              |         |           |
| Py4 Br               | linlogit | 8020             | 3.9 ± 0.058                        | 1.79    | 0.000448  |
| Py4-4NMe2 (CF3SO2)2N | linlogit | 48.5             | 1.69 ± 0.12                        | 1.42    | 0.0361    |
| Py4-4NMe2 Cl         | linlogit | 87.3             | 1.94 ± 0.081                       | 1.86    | 0.118     |
| Py6-4NMe2 (CF3SO2)2N | linlogit | 8.5              | 0.93 ± NA                          | 1.68    | 0.127     |
| Py6-4NMe2 Cl         | linlogit | 8.45             | 0.927 ± 0.078                      | 2.04    | 0.366     |
| Pyr11CN (CF3SO2)2N   | linlogit | 6370             | 3.8 ± NA                           | 3.69    | 0.000254  |
| Pyr11CN Cl           | probit   | 17100            | 4.23 ± NA                          | 0.137   | 0         |
| Pyr11O2 (CF3SO2)2N   | linlogit | 1810             | 3.26 ± 0.044                       | 4.5     | 0.000426  |
| Pyr11O2 Cl           | probit   | 830              | 2.92 ± NA                          | 0.11    | 0         |
| Pyr12O1 (CF3SO2)2N   | linlogit | 1990             | 3.3 ± 0.037                        | 5.11    | 0.000397  |
| Pyr12O1 Cl           | inactive | > 20000          | > 4.3                              |         |           |
| Pyr12O2 (CF3SO2)2N   | linlogit | 1580             | 3.2 ± 0.053                        | 3.32    | 0.000425  |
| Pyr12O2 Br           | inactive | > 20000          | > 4.3                              |         |           |
| Pyr12OH (CF3SO2)2N   | linlogit | 5240             | 3.72 ± 0.048                       | 3.03    | 0.000568  |
| Pyr12OH I            | inactive | > 20000          | > 4.3                              |         |           |
| Pyr13O1 (CF3SO2)2N   | linlogit | 2530             | 3.4 ± NA                           | 7.11    | 0.000233  |
| Pyr13O1 Cl           | inactive | > 50000          | > 4.7                              |         |           |
| Pyr13OH (CF3SO2)2N   | linlogit | 4010             | 3.6 ± 0.055                        | 3.15    | 0.000505  |
| Pyr13OH Cl           | inactive | > 20000          | > 4.3                              |         |           |
| Pyr14 (CF3SO2)2N     | probit   | 1020             | 3.01 ± 0.047                       | 0.23    | 0         |
| Pyr14 Cl             | inactive | > 20000          | > 4.3                              |         |           |
| DCOIT                | probit   | 1.15             | 0.0608 ± 0.051                     | 0.511   | 0.0514    |
| Carbendazim          | probit   | 7.12             | 0.852 ± 0.036                      | 0.46    | 0.0365    |

Table 1: (continued)

| Acronym  | mtype    | EC <sub>50</sub> | log <sub>10</sub> EC <sub>50</sub> | b     | c      |
|----------|----------|------------------|------------------------------------|-------|--------|
| Methanol | linlogit | 1567000          | 6.20 ± 0.032                       | NA    | NA     |
| Ethanol  | probit   | 683000           | 5.83 ± 0.098                       | 0.646 | 0.0984 |
| Propanol | probit   | 104000           | 5.02 ± 0.18                        | 1.44  | 0.183  |
